# Supplementary material for: PATZ1 in Non-Small Cell Lung Cancer: A New Biomarker That Negatively Correlates with PD-L1 Expression and Suppresses the Malignant Phenotype
Source: MDPI journal article supplement (doi:10.3390/cancers15072190), 2023-04-06
Supplement: s1 [file s1]

**A**

TCGA lung cancer RNA samples (n = 994)

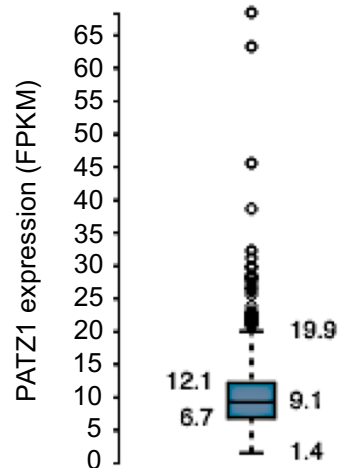**B**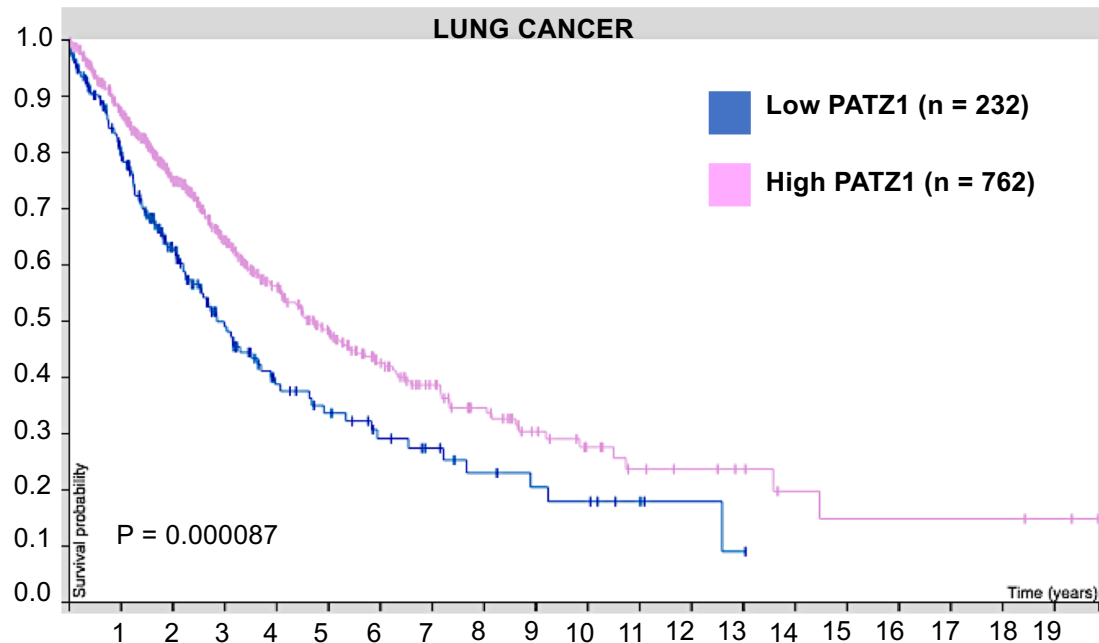

**Figure S1.** Survival analysis in patients affected by lung cancer. **(A)** TCGA lung cancer RNA samples were analyzed by RNAseq for PATZ1 expression through the the Human Protein Atlas web platform, subsection “pathology” [41]. Median expression was 9.1 FPKM (fragments per kilobase of exon per million mapped fragments). **(B)** The graph shows survival probability based on PATZ1 expression (cut off: 6.55 FPKM). The results indicate that PATZ1 is prognostic, high expression is favorable in lung cancer.

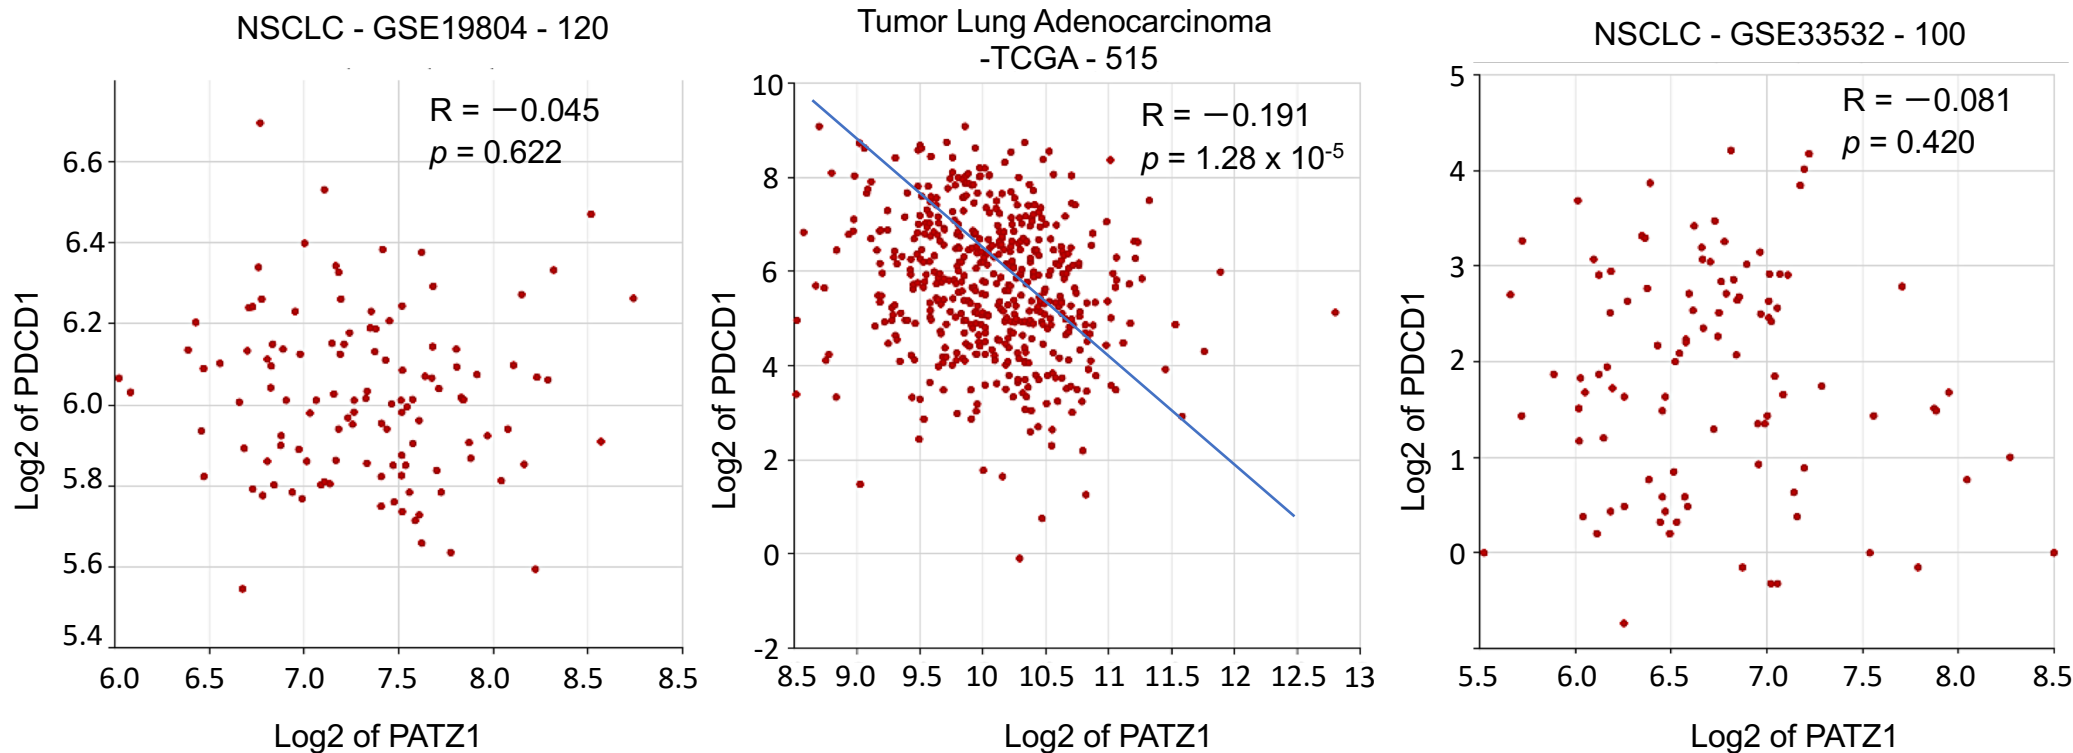

**Figure S2.** Correlation analysis between PATZ1 and PDCD1. XY-dotplots showing the correlation between PATZ1 (X-axis) and PDCD1 (Y-axis) gene expression in three publicly available NSCLC gene expression datasets analyzed via the R2: genomic Analysis and Visualization platform [36]. The correlation was significant only in the LUAD TCGA dataset (middle panel).

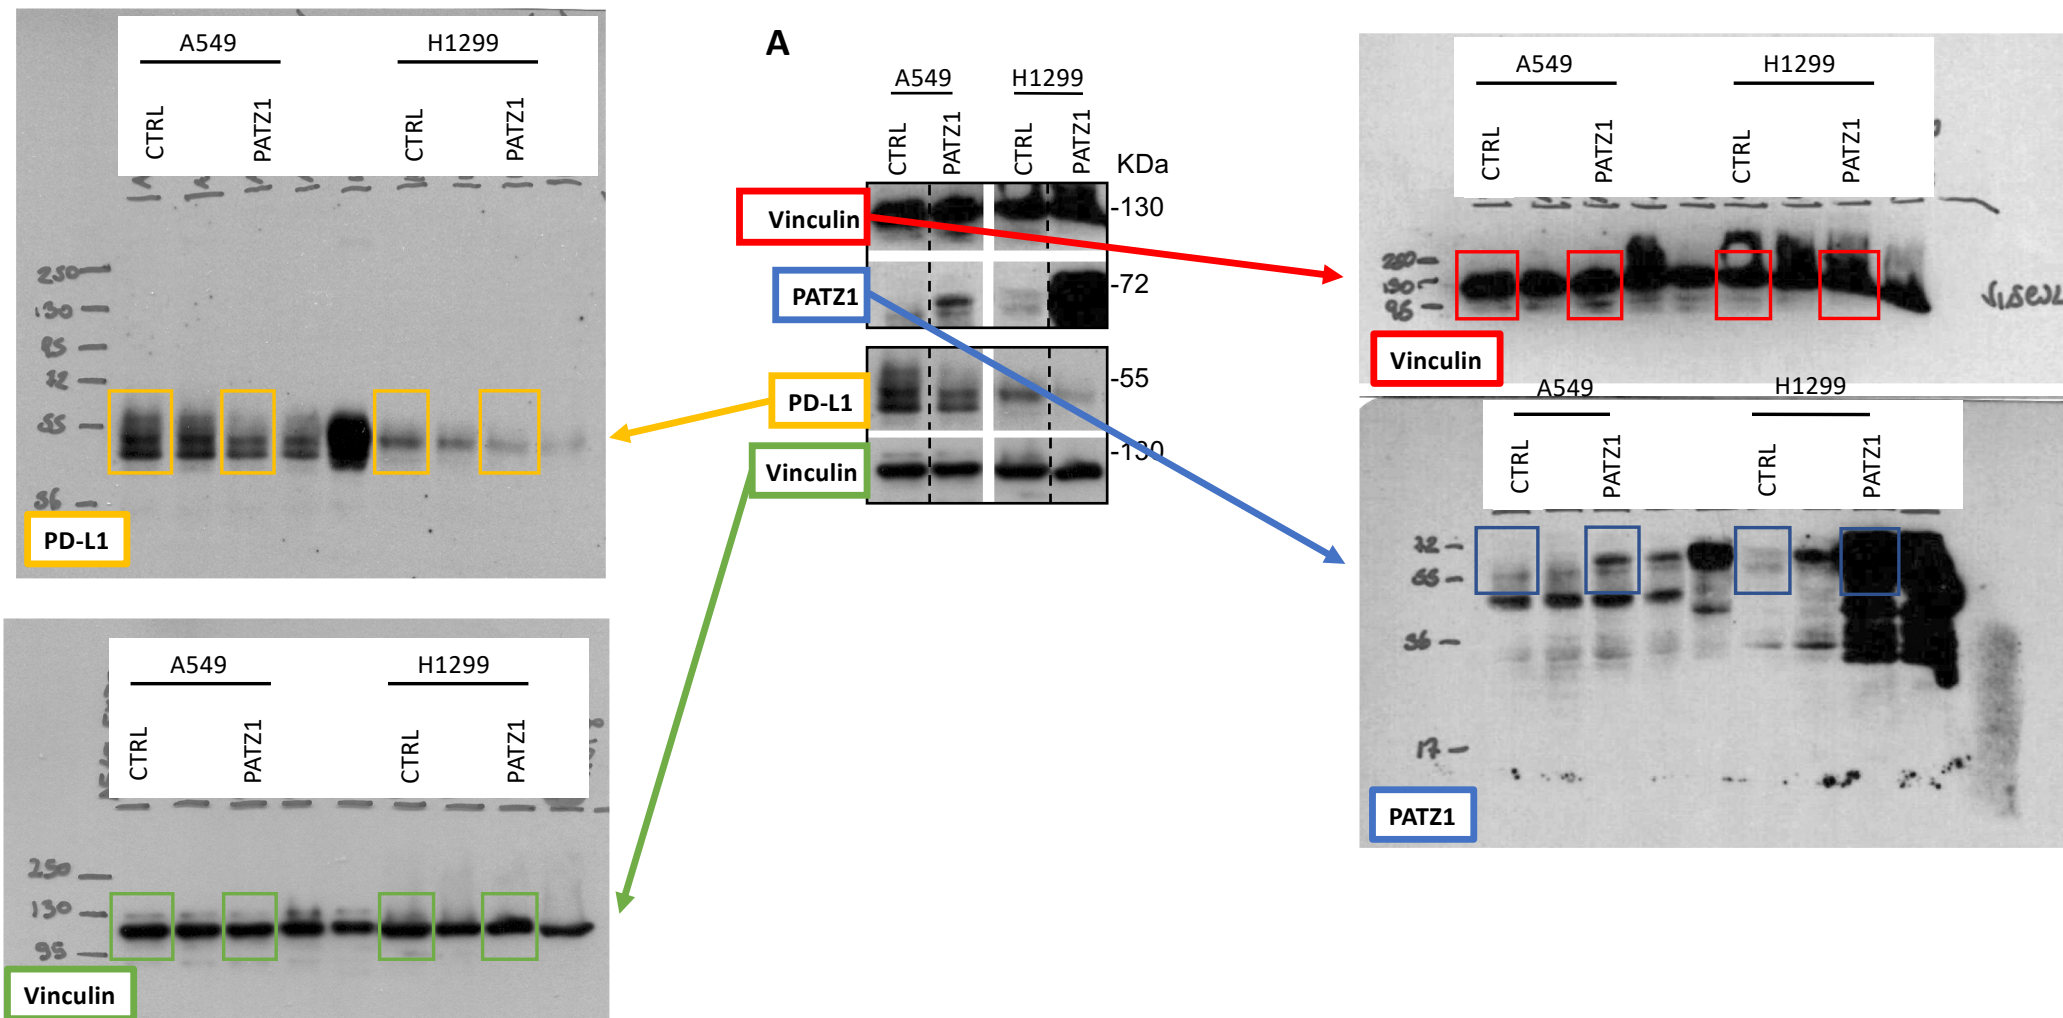

**Figure S3.** Original uncropped images of western blots for Figure 5A

**A****Amplification Plot**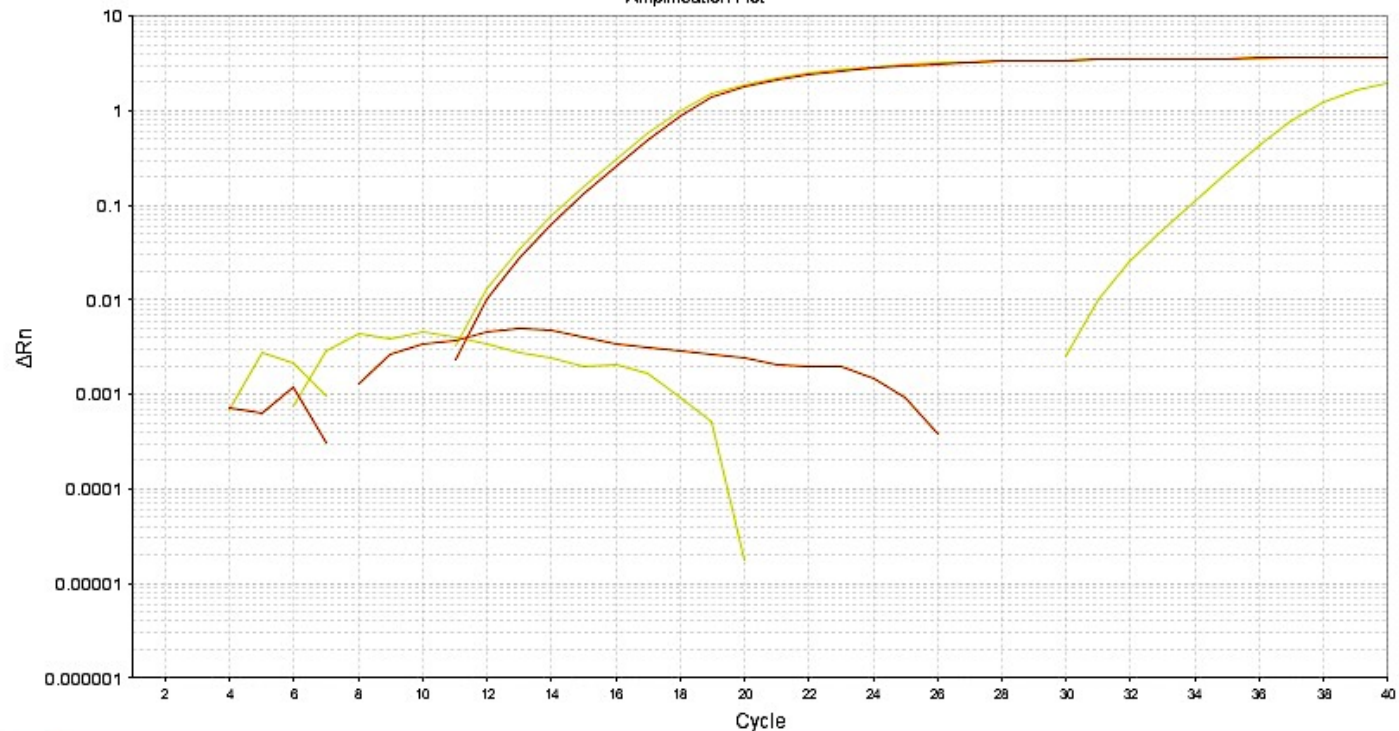**B****Melt Curve**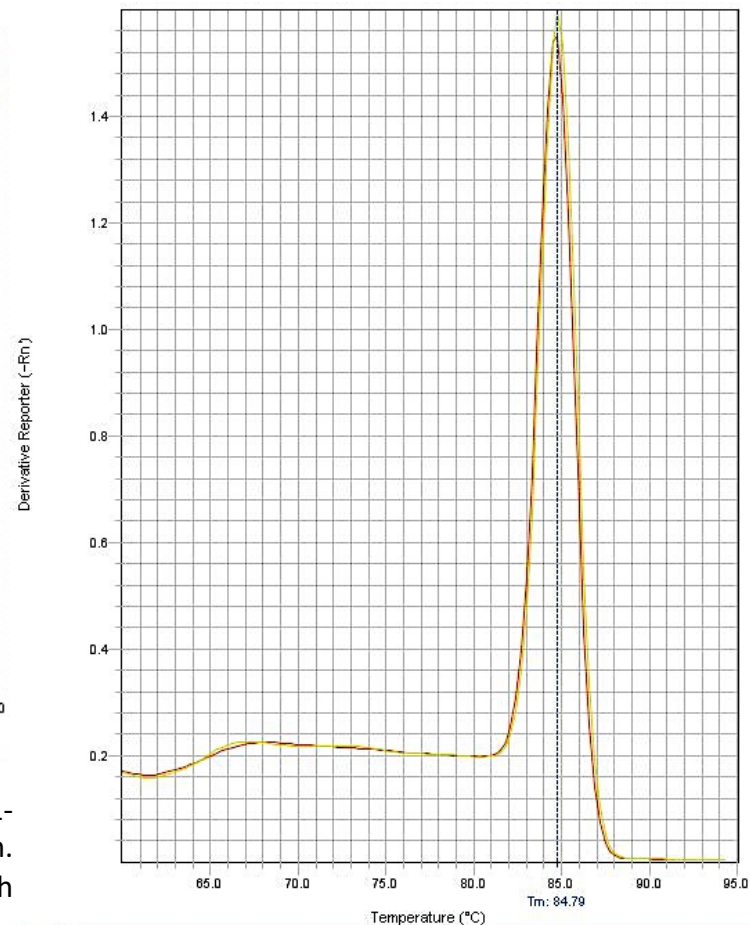

**Figure S4. (A)** Representative amplification plot of CDH1 and beta-actin (internal control) in PATZ1-overexpressing (yellow) and control (red) H1299 cells. **(B)** Melting curves for beta-actin amplification. A distinct curve ( $T_m = 84.79$ ), indicative of a specific amplified transcript, was observed in both samples.

**D**

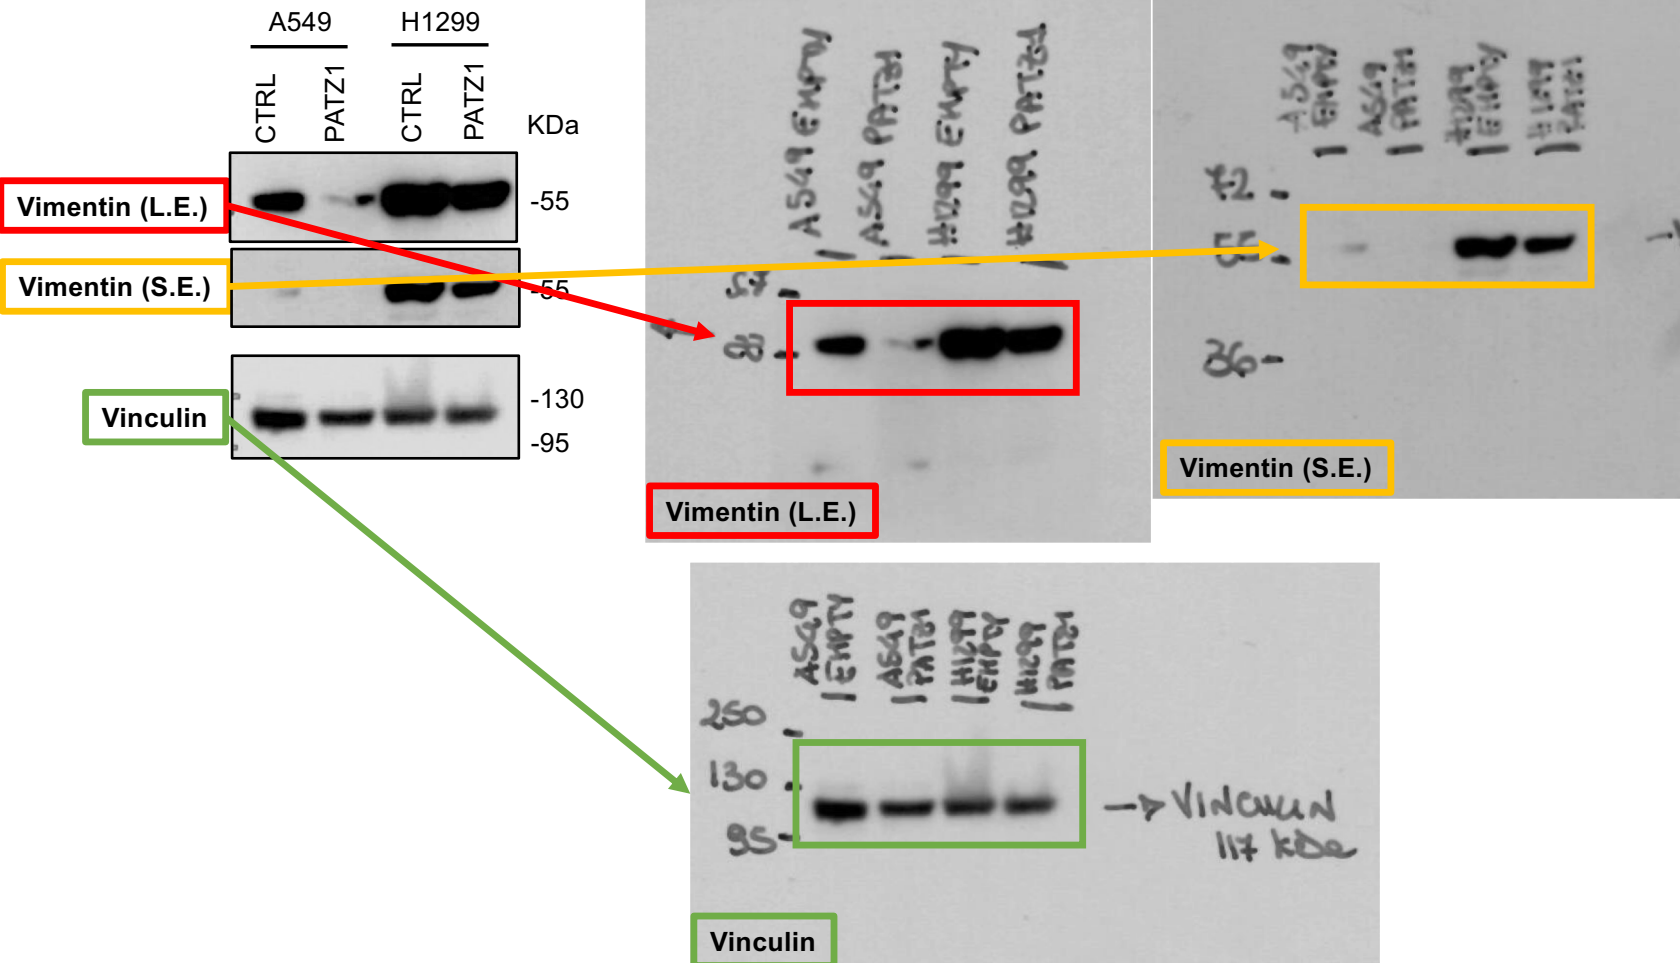

**Figure S5.** Original images of western blots for Figure 8D

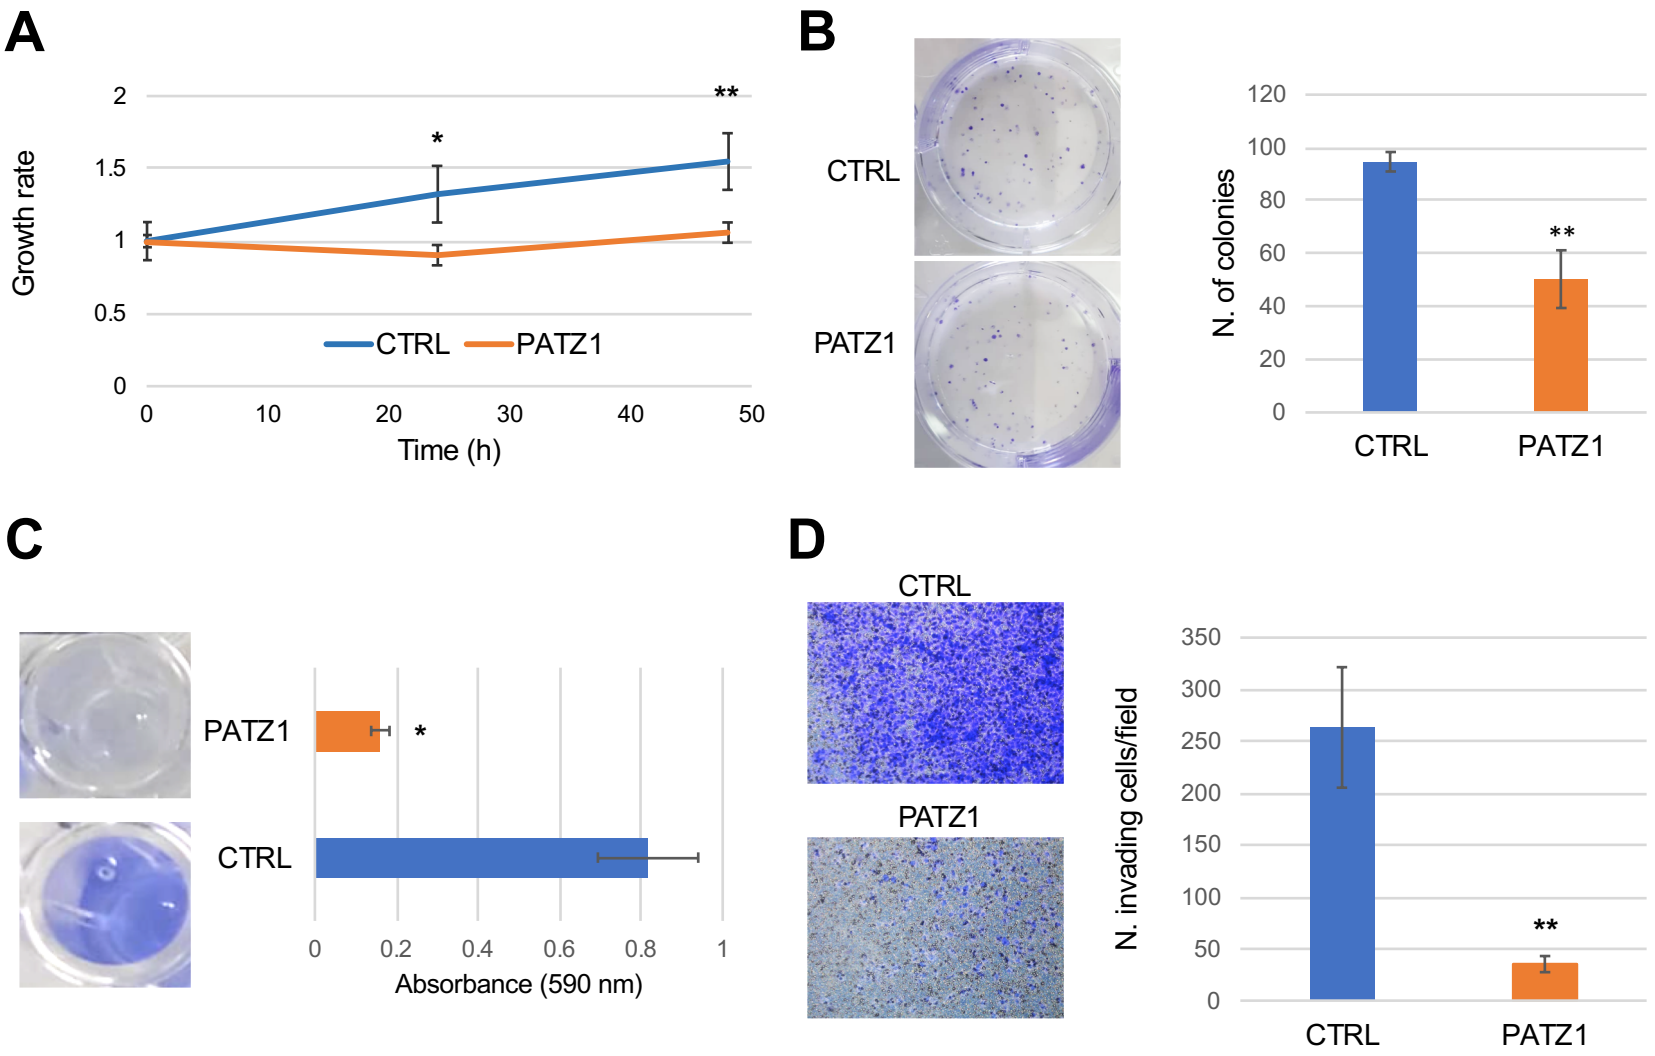

**Figure S6.** Functional analysis of PATZ1 overexpressing H1299 NSCLC cells. The cells were transfected with a vector expressing PATZ1 cDNA or its corresponding empty vector. **(A)** Proliferation assay by cell viability analysis. Growth rate was calculated with respect to time 0 corresponding to 24 h post-transfection. **(B)** Colony-forming assays. Cells were plated 5h post-transfection, cultured for 10 days in presence of G418, and stained with crystal violet. The average number of colonies  $\pm$  SE was reported in the bar graph. A representative experiment is shown on the left of the graph. **(C)** Transwell migration assay. A representative experiment is shown on the left. The color was eluted, and absorbance measured at 590nm. Mean values  $\pm$  SE are shown on the right. **(D)** Invasion transwell assays through a Matrigel layer. Representative images of a field of view (10 $\times$  magnification) are shown on the left. Mean values  $\pm$  SE of 15 and 10 fields are shown on the right for CTRL and PATZ1, respectively. All experiments were performed in triplicate. \*,  $p < 0.05$ ; \*\*,  $p < 0.01$ .

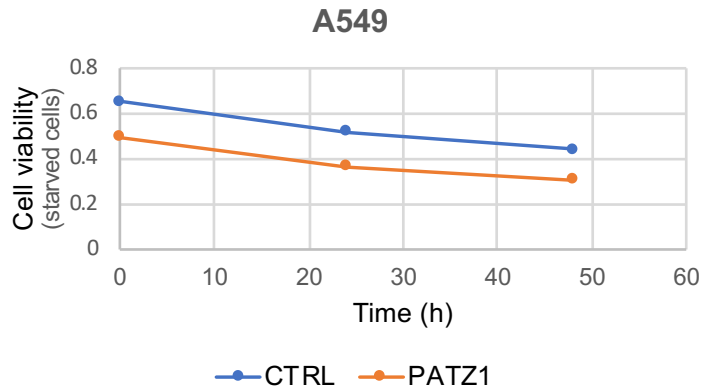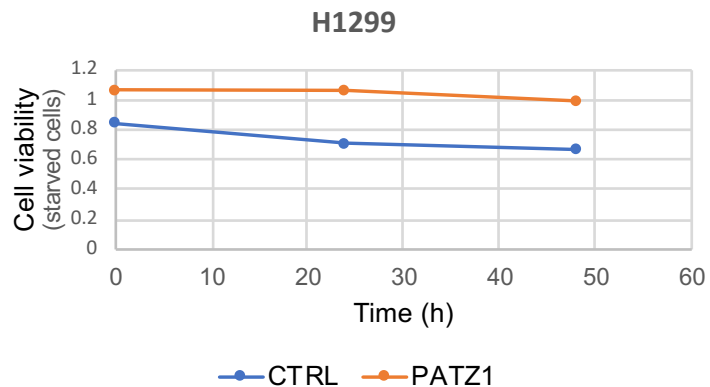

**Figure S7.** PATZ1 overexpression does not inhibit cell proliferation in starved NSCLC cells. Cell viability assay was carried out in parallel with the transwell assay. No differences were detected between PATZ1-transfectants and controls in both A549 and H1299 cell lines.



NSCLC - GSE31552 - 131

LUAD - GSE10072 - 107

LUSC - TCGA - 81

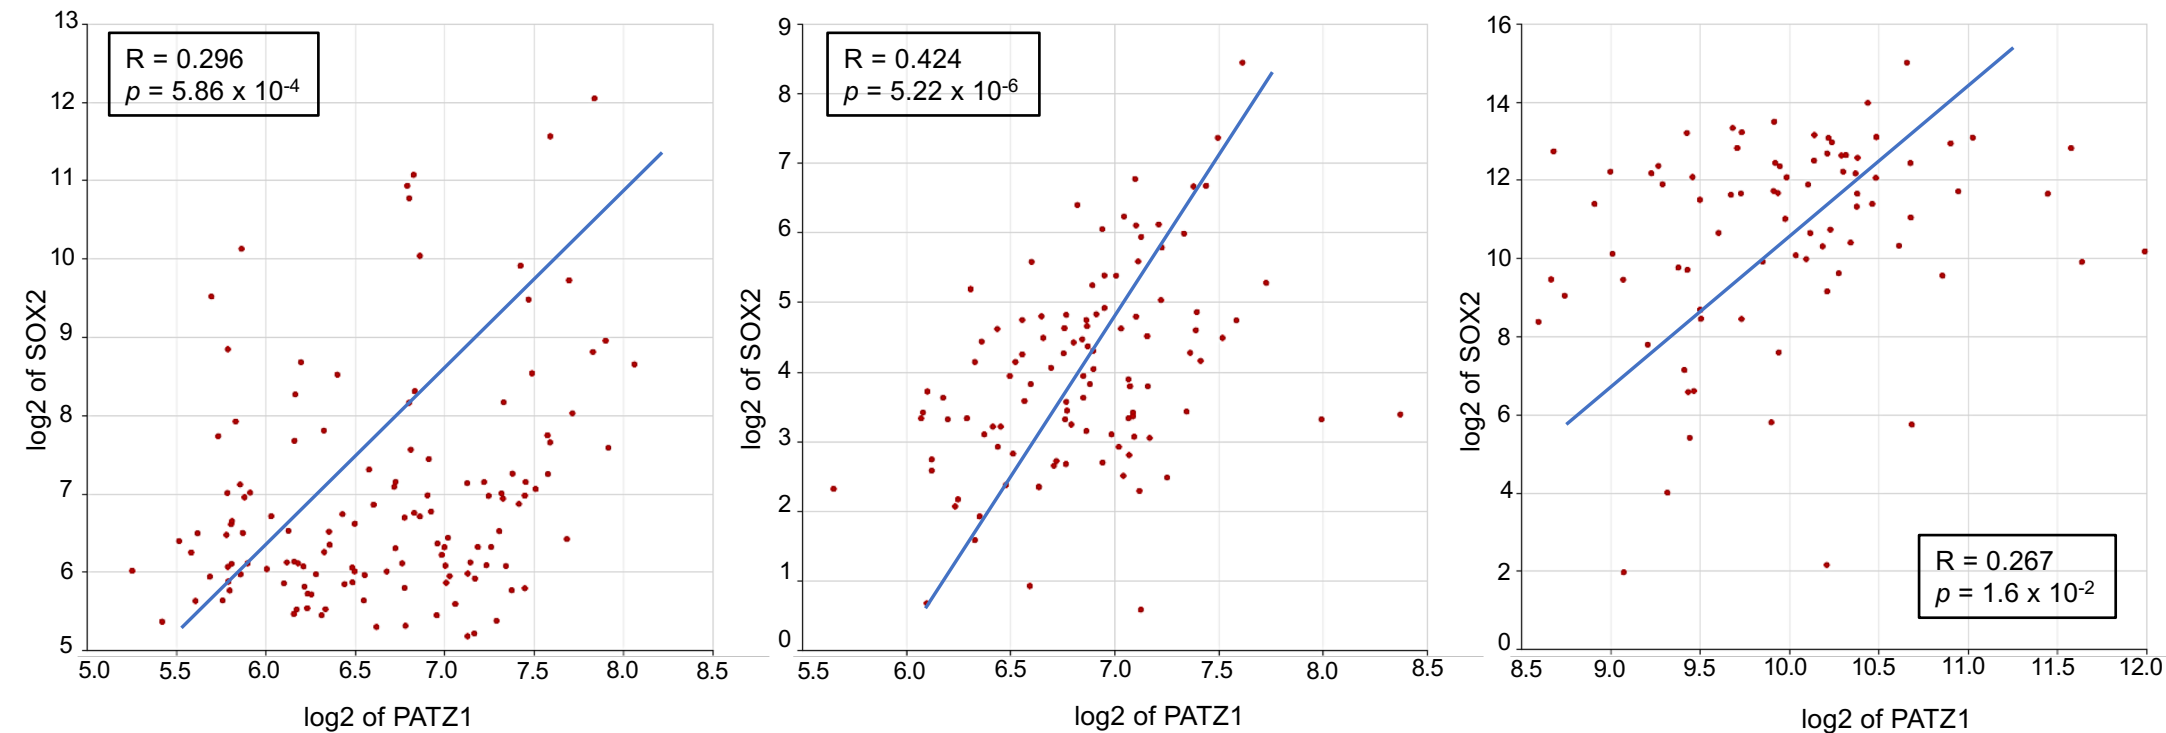

**Figure S8.** PATZ1 and SOX2 expression positively correlate in NSCLC. XY-dotplots showing the correlation between PATZ1 (X-axis) and SOX2 (Y-axis) gene expression in three publicly available gene expression NSCLC datasets analyzed via the R2: genomic Analysis and Visualization platform [36].



## PATZ1

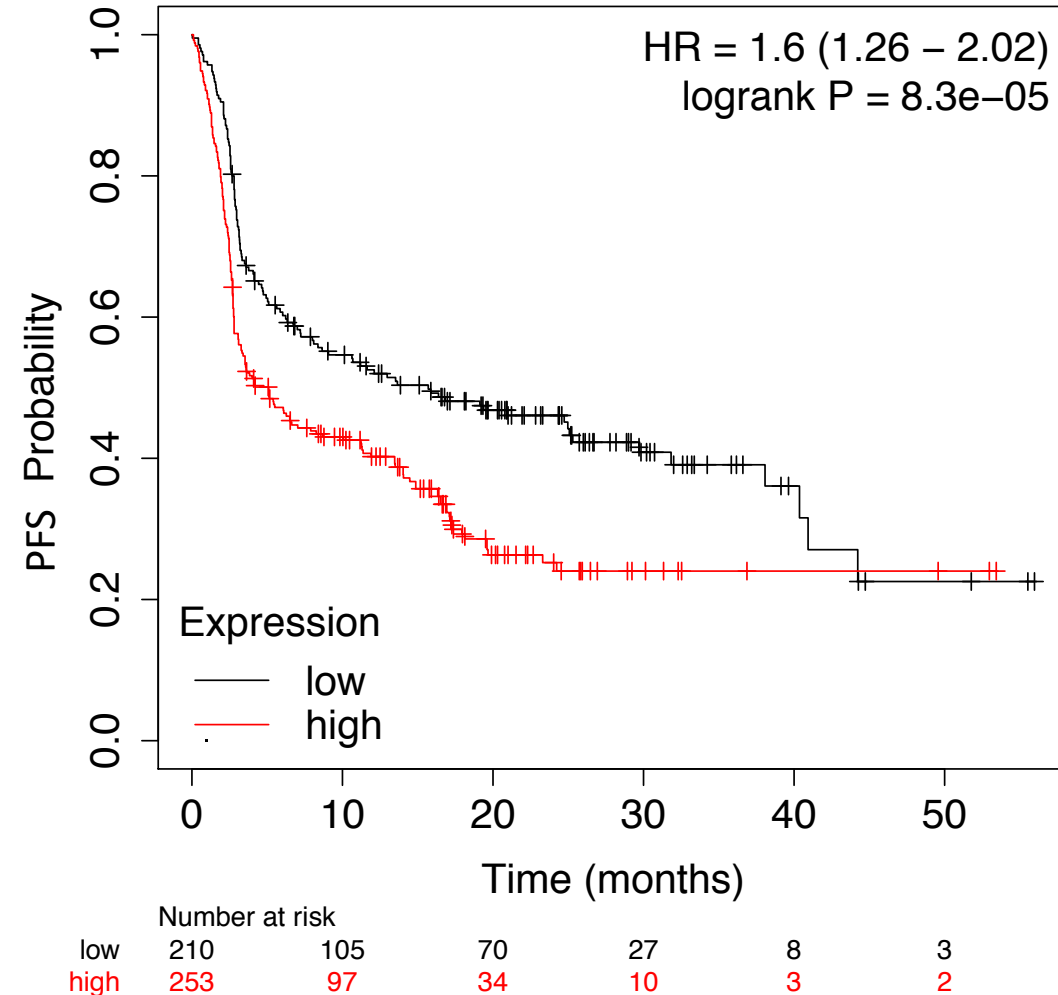

**Figure S9.** High expression of PATZ1 gene is associated with a worse progression-free survival (PFS) after immunotherapy. Kaplan-Meier curves in a cohort of PAN-cancer patients using publicly available transcriptomic and clinical data via the Kaplan-Meier Plotter platform [33]. The expression cutoff was set to 224 (close to the median) according to the scan function. HR, Hazard ratio.
